# Supplementary material
Source: MDPI journal article supplement (https://www.mdpi.com/2073-4395/9/9/563)
Supplement: s1 [file s1]

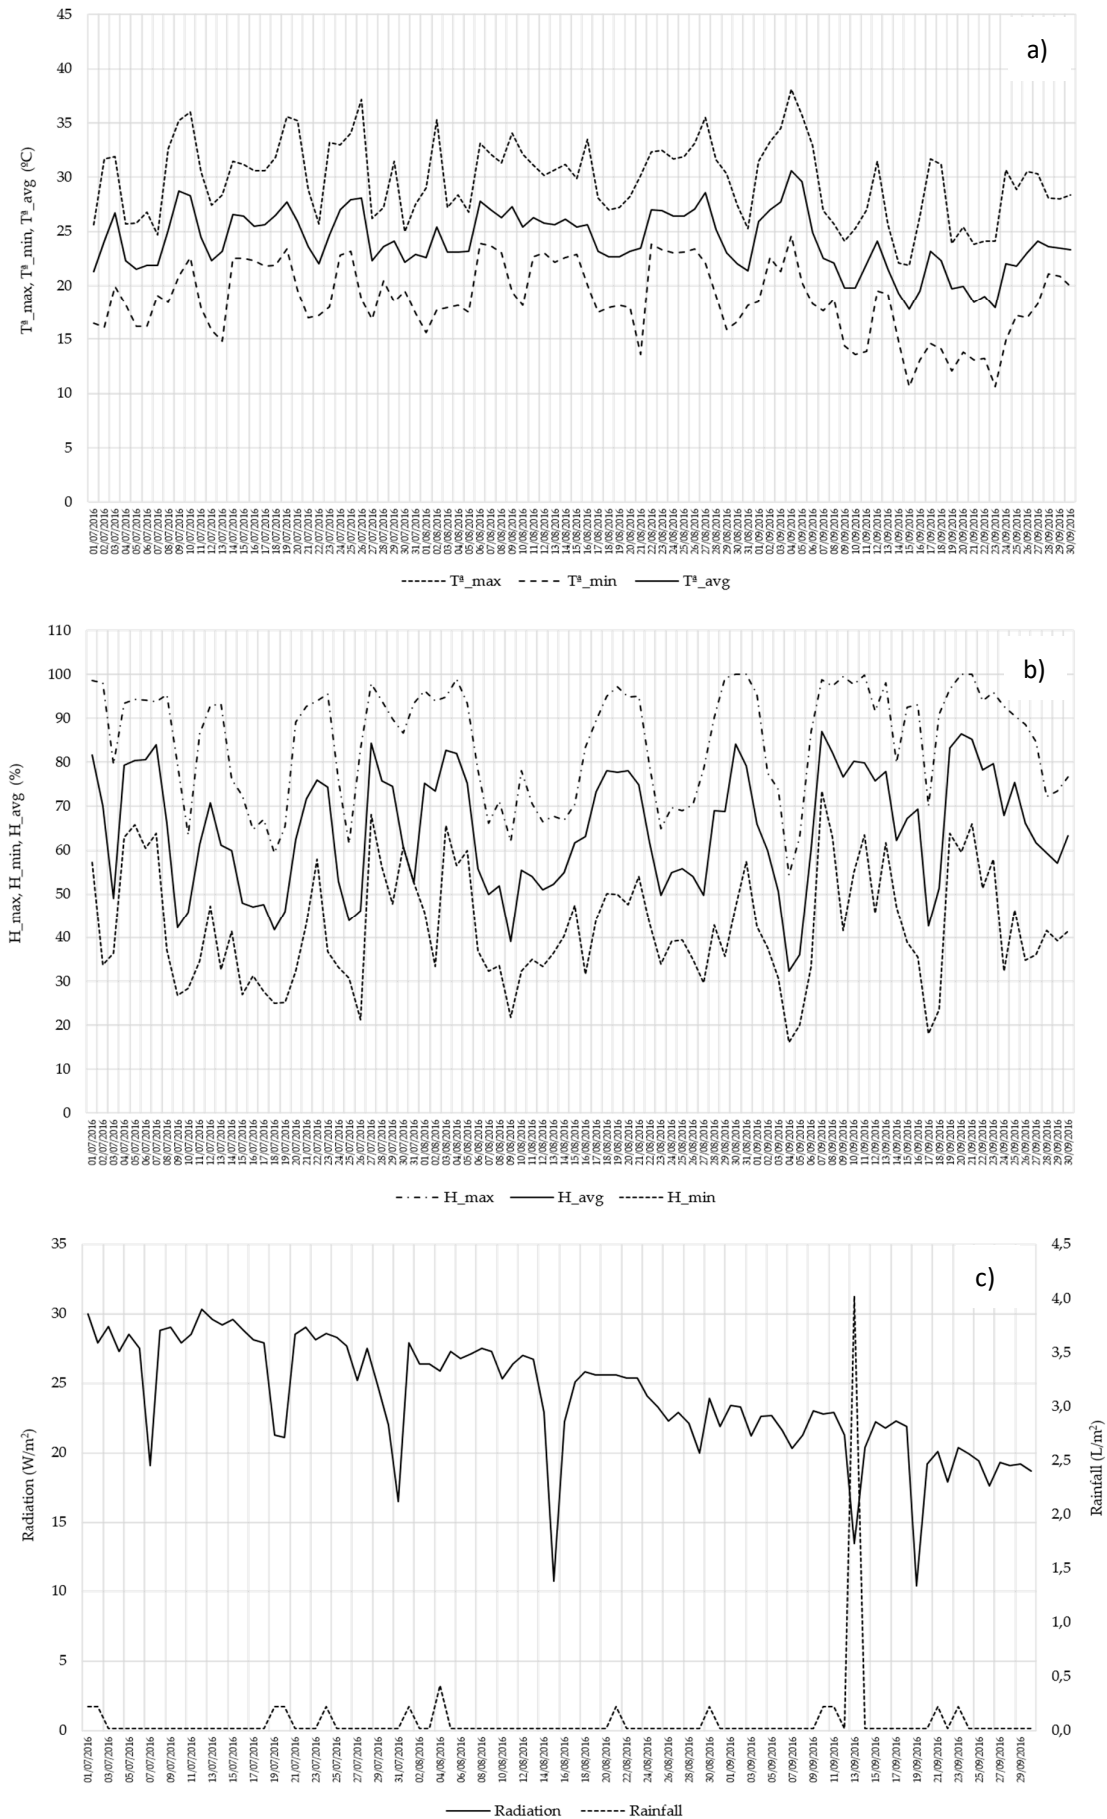

Figure S1. a) Temperature ( $^{\circ}\text{C}$ ) ( $T^a_{\text{max}}$ ,  $T^a_{\text{min}}$ ,  $T^a_{\text{avg}}$ ), b) Humidity (%) ( $H_{\text{max}}$ ,  $H_{\text{min}}$ ,  $H_{\text{avg}}$ ) and c) Radiation ( $\text{W}/\text{m}^2$ ) and Rainfall ( $\text{L}/\text{m}^2$ ) between July – September 2016.

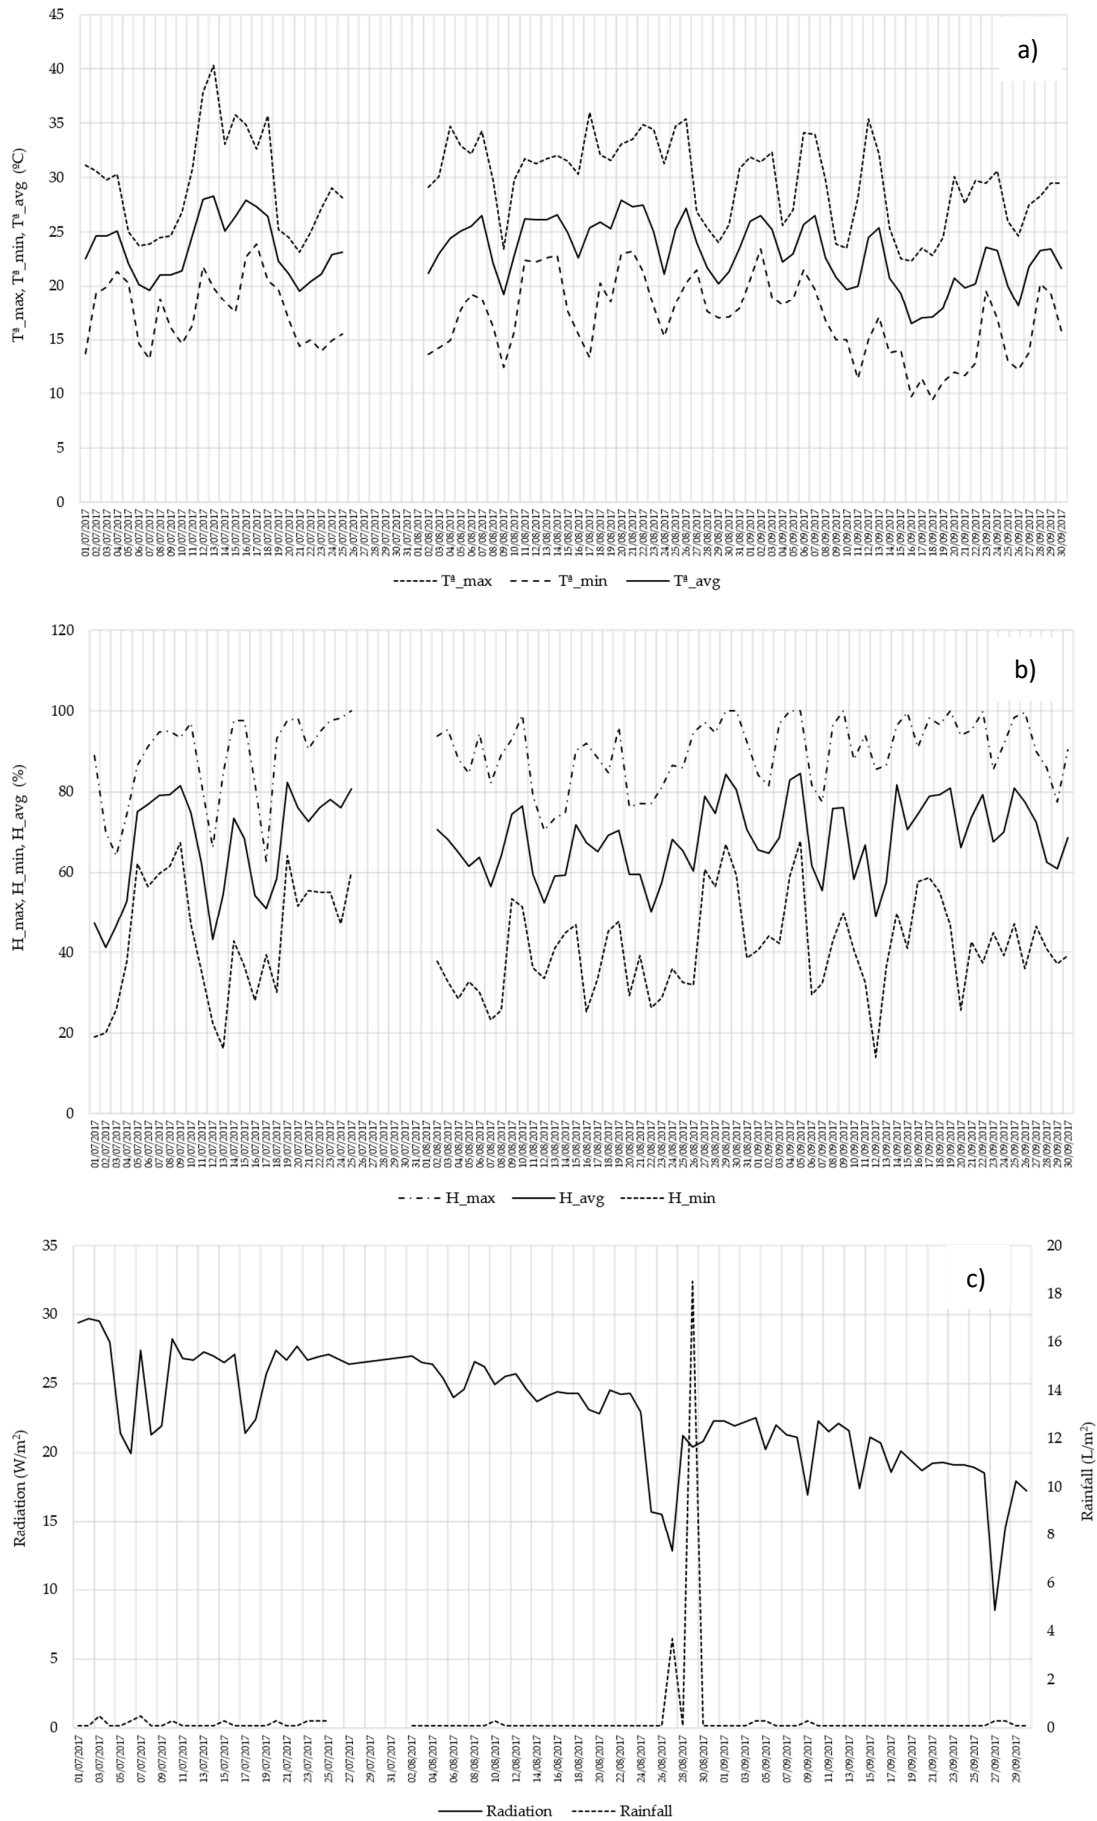

Figure S2. a) Temperature (°C) ( $T^a_{max}$ ,  $T^a_{min}$ ,  $T^a_{avg}$ ), b) Humidity (%) ( $H_{max}$ ,  $H_{min}$ ,  $H_{avg}$ ) and c) Radiation ( $W/m^2$ ) and Rainfall ( $L/m^2$ ) between July – September 2017.
